# Supplementary material
Source: publisher figshare collection journal article supplement (https://frontiersin.figshare.com/ndownloader/files/25961252)
Supplement: Supplementary file [file 25961252]

**Supplementary Table 1:** NCBI accession number and UniProt-  
UniParc ID of the different MiT/TFE proteins analyzed in Fig. 1

| Protein name   | Accession number     | UniProt/UniParc |
|----------------|----------------------|-----------------|
| Hs TFEB        | NP_001258873.1       | P19484          |
| Mm TFEB        | NP_001155195.1       | Q9R210          |
| Gg Tfeb        | NP_001026093.1       | Q5ZM43          |
| Xt Tfeb        | NP_001072648.1       | Q08D59          |
| Dr Tfeb L      | NP_001244121.1       | G5CIM3          |
| Dr Tfeb S      | XP_005172943.1       | UPI000383593B   |
| Hs TFE3        | NP_006512.2          | P19532          |
| Mm TFE3        | NP_766060.2          | Q64092          |
| Pc Tfe3        | XP_031467342.1       | UPI00129DFBD3   |
| Sh Tfe3        | XP_030330138.1       | UPI0011CFA89D   |
| Dr Tfe3a L     | NP_571923.2          | Q561Z2          |
| Dr Tfe3a S     | XP_005166762.1       | UPI00038379F2   |
| Dr Tfe3b       | XP_005169362.1       | F1R1N1          |
| Hs TFEC        | NP_036384.1          | O14948          |
| Mm TFEC        | XP_006505098.1       | Q9WTW4          |
| Gg Tfec        | NP_001006229.2       | Q5XFQ6          |
| Xt Tfec        | XP_002935013.2       | A0A5G3L0Y2      |
| Dr Tfec P1     | NP_001025276.2       | Q1JQ62          |
| Dr Tfec P2     | XP_005164592.1       | UPI0003837C91   |
| Dr Tfec P3     | XM_009299965.1       | UPI0000545E20   |
| Hs MITF iso1   | NP_937802.1          | O75030-1        |
| Hs MITF iso4   | NP_000239.1          | O75030-9        |
| Mm Mitf isoX2  | XP_006505748.1       | A0A5H1ZRM6      |
| Mm Mitf isoX10 | XP_006505758.1       | Q08874          |
| Gg Mitf isoX1  | XP_015148452.2       | UPI000D63E60E   |
| Gg Mitf isoX8  | XP_015148459.1       | B6E281          |
| Xt mitf        | NP_001093747.1       | A4IID0          |
| Dr Mitfa       | ENSDART00000056457.5 | Q9PWC2          |
| Dr Mitfb       | AEP16359.1           | F1Q885          |
| Dm Mitfa       | NP_001033808.1       | Q6WSQ9          |
| Dm Mitfc       | NP_001245436.1       | C3KGP2          |
| Ce HLH30       | NP_500462.1          | H2KZZ0          |
